# Supplementary material for: The APSES Transcription Factor SsStuA Regulating Cell Wall Integrity Is Essential for Sclerotia Formation and Pathogenicity in Sclerotinia sclerotiorum
Source: MDPI journal article supplement (doi:10.3390/jof10040238), 2024-03-22
Supplement: s1 [file s1]

## Supplementary Materials

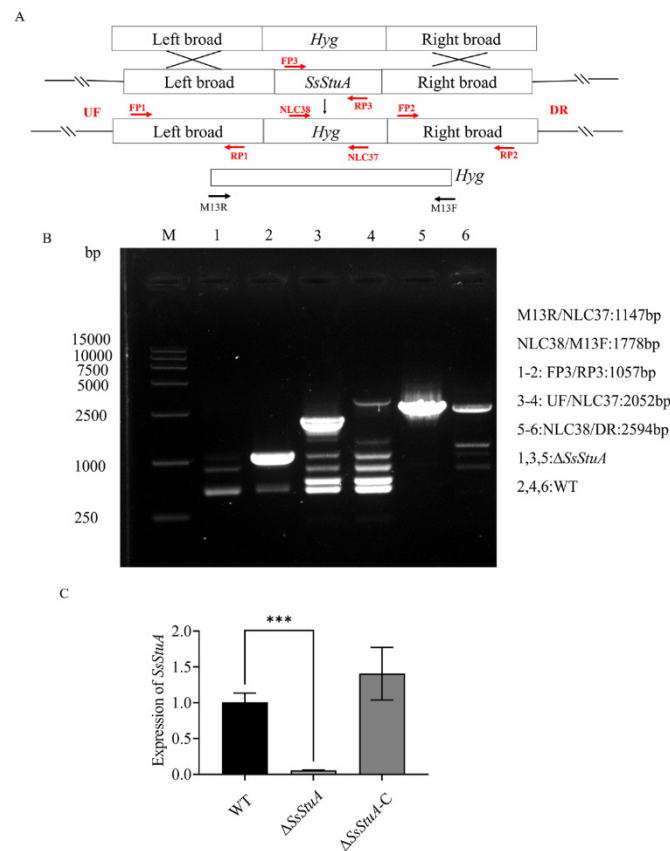

**Figure S1.** Identification of mutants by PCR and qPCR. (A) The knockout strategy of *SsStuA* gene. (B) Knockout of *SsStuA* was verified by PCR. (C) The knockout and complementation mutants of *SsStuA* were verified by PCR. Error bars represent the SDs and significant difference was performed by *t* test (\*\*\*,  $p < 0.001$ ).

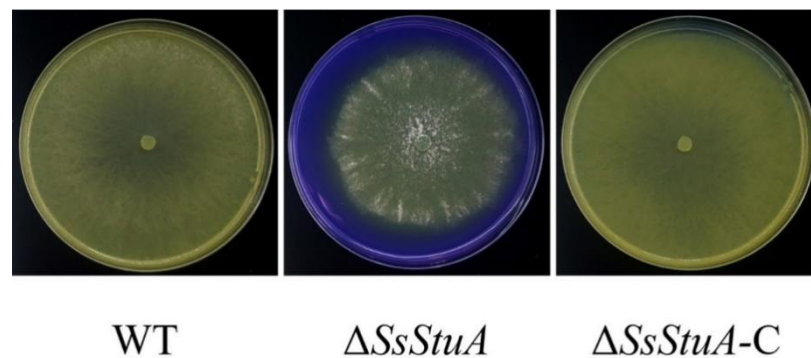

**Figure S2.**  $\Delta SsStuA$  produced oxalic acid normally. Photographs were taken at 2 days post-inoculation.

**Table S1.** Primers used in this paper.

| The name of primer      | Sequence                                   |
|-------------------------|--------------------------------------------|
| SsStuA-F1               | AAGAAGCGACAAGCACAA                         |
| SsStuA -R1              | TCCTGTGTGAAATTGTTATCCGCTGGGAGGGAAACAGGTAAA |
| SsStuA -F2              | GTCGTGACTGGGAAAACCCTGGCGAAAGCATTCTCGGCAATC |
| SsStuA -R2              | TACCACCTCATCTCCACAAG                       |
| SsStuA -F3              | TCTAAAGGGTGTTTGGTAA                        |
| SsStuA -R3              | TAGTATGACTGTGGTGCTGA                       |
| M13R                    | AGCGGATAACAATTTACACACAGGA                  |
| NLC37                   | GGATGCCTCCGCTCGAAGTA                       |
| NLC38                   | CGTTGCAAGACCTGCCTGAA                       |
| M13F                    | CGCCAGGGTTTTCCCAGTCACGAC                   |
| UF                      | TCGCATCCCTCGAATCGAAG                       |
| DR                      | ATATCAAAATCATCCATCAT                       |
| SsStuA -CF1             | AAGAAGCGACAAGCACAA                         |
| SsStuA -CR1             | CACTGGAACAACCTGGCATGTACCACCTCATCTCCACAAG   |
| SsStuA -CF2             | CAGGTACACTTGTTTAGAGGTGGTTAGGATGATGGTATGGAT |
| SsStuA -CR2             | TTATCGGAGTCTGTGGATTG                       |
| DW69                    | CATGCCAGTTGTTCCAGTG                        |
| DW70                    | ACCTCTAAACAAGTGTACCTG                      |
| pHIS- sscl_01g011560-F  | AATACGACTCACTATAGGGCCAAGGTTCTTTTCATCAAATG  |
| pHIS - sscl_01g011560-R | CGAACGCGTGAGCTCCCCGGTGTATCAACGGATTAGATGC   |
| pHIS - sscl_04g037170-F | AATACGACTCACTATAGGGCACCAATATCTCCGGAATCAA   |
| pHIS - sscl_04g037170-R | CGAACGCGTGAGCTCCCCGGTATTTTCGGTTTTGATAGTAG  |
| pHIS - sscl_15g107280-F | AATACGACTCACTATAGGGCAACATTTTTGAGAAGATGGG   |
| pHIS - sscl_15g107280-R | CGAACGCGTGAGCTCCCCGGGTTGTTTGATTTTCGTTTGAC  |
| pHIS - sscl_05g044180-F | AATACGACTCACTATAGGGCTTGTATATCATTTTTCTT     |
| pHIS - sscl_05g044180-R | CGAACGCGTGAGCTCCCCGGTTTGTAAGTGTAACCGTAG    |
| pHIS - sscl_15g104430-F | AATACGACTCACTATAGGGCGTTAAATTATTTCTTTTCGA   |
| pHIS - sscl_15g104430-R | CGAACGCGTGAGCTCCCCGGTGCATCCATTAACCTATTTC   |
| pHIS - sscl_05g047950-F | AATACGACTCACTATAGGGCTATAGAGAAAGAGAAGTACA   |
| pHIS - sscl_05g047950-R | CGAACGCGTGAGCTCCCCGGAATGAATTATTGTAATGATA   |
| pHIS - sscl_03g026200-F | AATACGACTCACTATAGGGCTTTTGACGATGTGCGTACTG   |
| pHIS - sscl_03g026200-R | CGAACGCGTGAGCTCCCCGGGATTGCTATTATATTGCTTG   |
| pHIS - sscl_08g064900-F | AATACGACTCACTATAGGGCGTTGACGCCAGAGTTATGGA   |
| pHIS - sscl_08g064900-R | CGAACGCGTGAGCTCCCCGGGATTGCGGTTTACTACACTT   |
| AD-SsStuA-F             | GAATTCATGAACCACGGTCCTCAAG                  |
| AD-SsStuA-R             | CTCGAGTTACCGGCGTCGTTGTGTA                  |
| ONG-SsStuA-F            | GAATGGATGAACCTTTACAAAATGAACCACGGTCCTCAAGA  |
| ONG-SsStuA-R            | CATCTTATCTACATACGCTACCGGCGTCGTTGTGTAATGGTT |
| Actin-F                 | GAATGTGTAAGGCCGGTTTCGC                     |
| Actin-R                 | CATCCCAGTTGGTGACGACACC                     |
| QsStuA -F               | AGCCTGGTCCTGCACATTAC                       |
| QsStuA -R               | TACCTTGGCCACCCATTGAC                       |
| QsCYP51-F               | AAAACGACGTGCTCAGGCTA                       |
| QsCYP51-R               | GGAACGGGGGTTCCATCTTT                       |
| QsBIP1-F                | TGTATCAACCTTAACCCCTGCC                     |
| QsBIP1-R                | TGATAAGCTCTTCGACGCGG                       |
| QsHAC1-F                | ATGCAATCAGCAATGGGCAC                       |
| QsHAC1-R                | AGGCCGTTGTACTTTTCGGTT                      |
| QsIRE1-F                | GGTCGACACAGGCCTAACAA                       |

---

|                    |                       |
|--------------------|-----------------------|
| QsIRE1-R           | ATCAACCTGCACCATCTGGG  |
| QGNA1-F            | TATGGGAACGGGCACACTTG  |
| QGNA1-R            | CGTGCCAAATTGCTGTCCTT  |
| QGFA1-F            | ACGAACAGAGAAGCGCATGA  |
| QGFA1-R            | AGAGGAAGTTTCCGACGCTG  |
| QUAP1-F            | ACAGGCAGAACGTATTTCGCA |
| QUAP1-R            | GTGTTGGCCCACTGGTCATA  |
| QAGM1-F            | GAGGGAACACCACAAGCGTA  |
| QAGM1-R            | AACAGTGACCGACCCAACAG  |
| QCHS1-F            | CAAGCCTTTGGTCGGGTACT  |
| QCHS1-R            | CTCCTGCACAAGTAGGCTCC  |
| QCHS2-F            | TCGTTCTGCTTTTCTCGTCA  |
| QCHS2-R            | AATGTTGCAGCCAAAGCGAG  |
| QCHS3-F            | CCAAGGCCTGGTACACCTTC  |
| QCHS3-R            | ATCGTCGCGTCATCTCCAAA  |
| QBCK1-F            | ACCGCAAGATCCAAGAAGGG  |
| QBCK1-R            | CGCGAAAGATCGTCTACGGA  |
| QPKC1-F            | GGTGTGCTTGGCGTTGAAAT  |
| QPKC1-R            | AGGCGATTGTTGGAGAAGCA  |
| QMKK1-F            | GCCACACCGATGGGAAGTAA  |
| QMKK1-R            | CTGGTGTTCCCTTGCGGTTTG |
| QSMK3-F            | TCGCAGAATTACTTGGCGGT  |
| QSMK3-R            | AAAGGTCGCTTGGCCATGTA  |
| QSWI6-F            | GCCCGTTTACCCGTTCTACA  |
| QSWI6-R            | ACTACGTCCTTTGACAGCCG  |
| Qsscle_01g011560-F | TGCAATTGGCAGCAGTCCTA  |
| Qsscle_01g011560-R | GCAGTGTTGGACCTCTCTCC  |
| Qsscle_04g037170-F | ACCCTCAGAAGATTGCAGCC  |
| Qsscle_04g037170-R | GGCACCAGCTTTTCTCAGCTA |
| Qsscle_15g107280-F | TTCCCATCCTTCACCCATGC  |
| Qsscle_15g107280-R | TGATTTGCCTCATCCTGCGT  |
| Qsscle_05g044180-F | TGCCATTGAGCGTGGAGATT  |
| Qsscle_05g044180-R | GCGGCGTCTGGATATGAGAA  |
| Qsscle_08g064900-F | AATTGCTGGTGCAGATTGCG  |
| Qsscle_08g064900-R | ATCCAACAACGGATCCCCAC  |
| Qsscle_15g104430-F | CAAAACGTCCATCCCCCTCA  |
| Qsscle_15g104430-R | ATCACTAGCCACAGGCACAC  |
| Qsscle_05g047950-F | TTATCCAGATGCCCATCGCC  |
| Qsscle_05g047950-R | CGTGACCTTATCGGCATTG   |
| Qsscle_03g026200-F | CCAGATACCCACCGTCATCG  |
| Qsscle_03g026200-R | ACCAACCTCAGCCAAGTAGC  |

---
